# Supplementary material for: Leptin attenuates the osteogenic induction potential of BMP9 by increasing β-catenin malonylation modification via Sirt5 down-regulation
Source: publisher site journal article supplement (doi:10.18632/aging.205790), 2024-05-03
Supplement: Supplementary file [file aging-v16i9-205790-supplementary-material-SD1.pdf]

**SUPPLEMENTARY FIGURE**

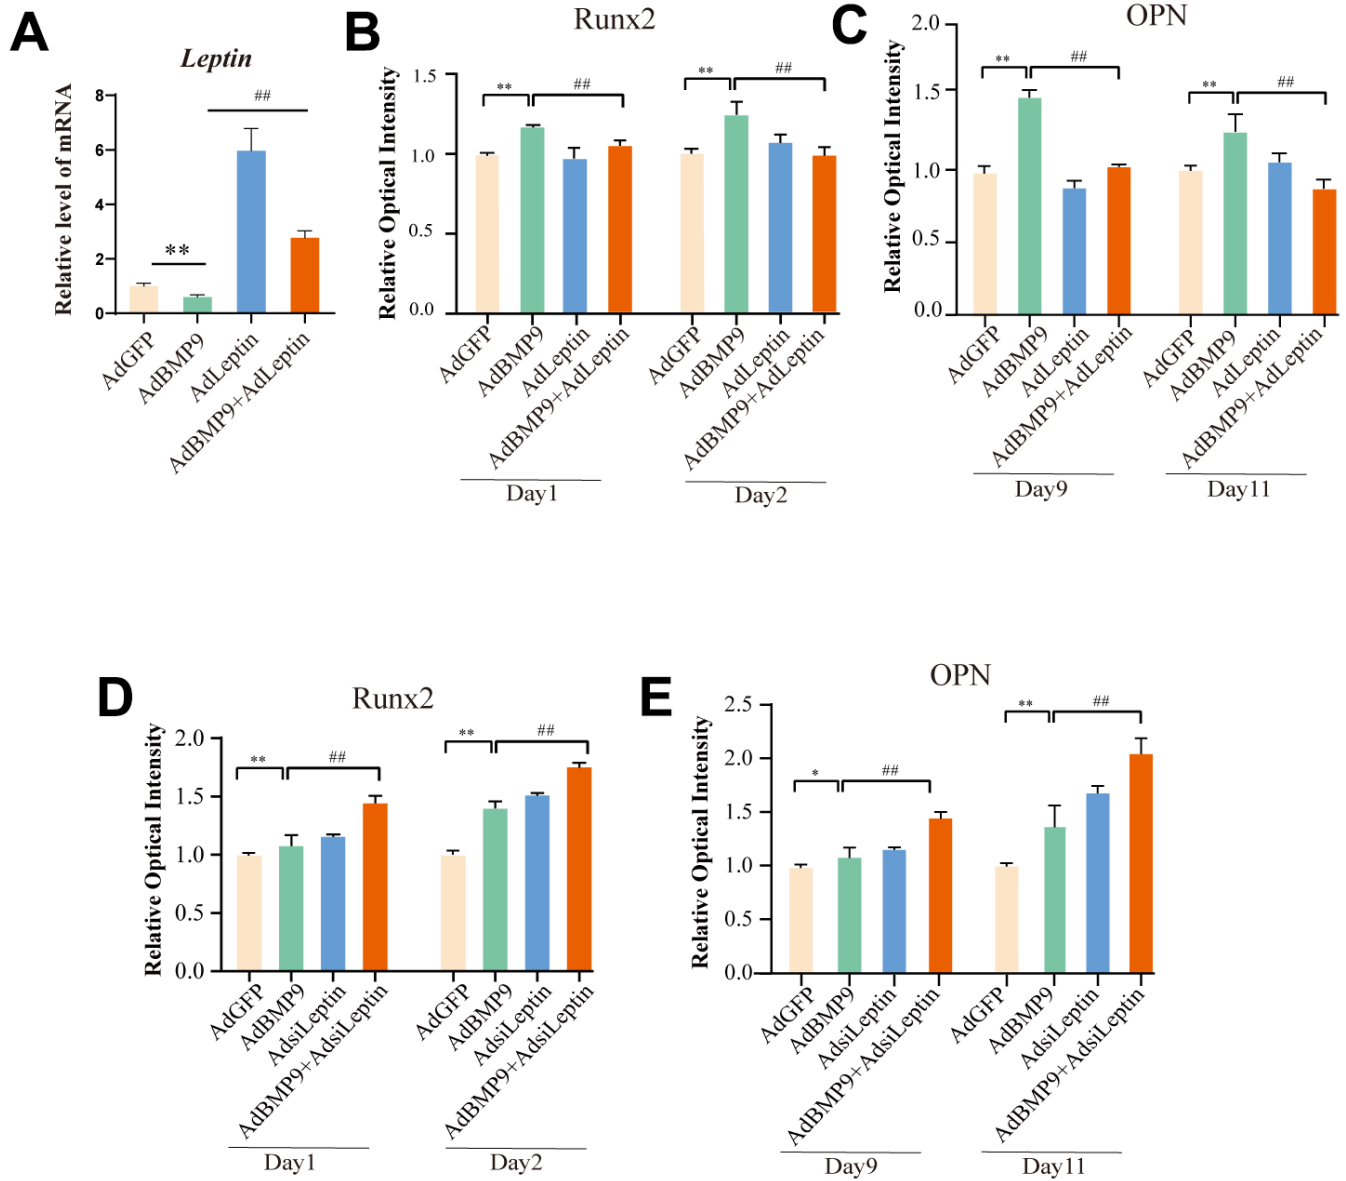

**Supplementary Figure 1.** (A) qPCR shows the level of Leptin. (B) Semi-quantification of the level of Runx2. (C) Semi-quantification of the level of OPN. (D) Semi-quantification of the level of Runx2. (E) Semi-quantification of the level of OPN.
